# Supplementary material
Source: MDPI journal article supplement (https://www.mdpi.com/2304-6732/8/11/476)
Supplement: s1 [file s1]

**Table S1.** Input parameters of the designed ellipsoidal mirror scanning system for Zemax simulation.

| Surf: Type |                        | Comment    | Radius   | Thickness | Glass   | Semi-Diameter | Conic  | Diffract Order | Decenter X         | Decenter Y | Tilt About X | Order |
|------------|------------------------|------------|----------|-----------|---------|---------------|--------|----------------|--------------------|------------|--------------|-------|
| OBJ        | Standard               |            | Infinity | Infinity  |         | 0             | 0.00   |                |                    |            |              |       |
| STO        | Standard               |            | Infinity | 30.00     |         | 12.88         | 0.00   |                |                    |            |              |       |
| 2*         | Standard               | f=200mm    | 67.14    | 12.00     | N-LAK22 | 25.4          | 0.00   |                |                    |            |              |       |
| 3*         | Standard               |            | -87.57   | 3.00      | N-SF6HT | 25.4          | 0.00   |                |                    |            |              |       |
| 4*         | Standard               |            | 234.27   | 142.95    |         | 25.4          | 0.00   |                |                    |            |              |       |
| 5          | Cordinate Break        |            |          | 0.00      | -       | 0.00          |        |                | 0.000              | 0          | -23.597      | 0     |
| 6*         | Standard               | RM No.1    | Infinity | 0.00      | MIRROR  | 2.95          | 0.00   |                |                    |            |              |       |
| 7          | Cordinate Break        |            |          | -158.28   | -       | 0.00          |        |                | 0.000              | 0          | 23.597       | 0     |
| 8          | Standard               | EM No.1    | 191.30   | 0.00      | MIRROR  | 129.30        | -0.043 |                |                    |            |              |       |
| 9          | Cordinate Break        |            |          | 241.72    | -       | 0.00          |        |                | 0.000              | 0          | 0.000        | 0     |
| 10         | Cordinate Break        |            |          | 0.00      | -       | 0.00          |        |                | 0.000              | 0          | -90.000      | 0     |
| 11         | Cordinate Break        |            |          | 0.00      | -       | 0.00          |        |                | 0.000              | 0          | 0.000        | 0     |
| 12*        | Standard               | RM No.2    | Infinity | 0.00      | MIRROR  | 7.17          | 0.00   |                |                    |            |              |       |
| 13         | Cordinate Break        |            |          | 0.00      | -       | 0.00          |        |                | 0.000              | 0          | 0.000        | 1     |
| 14         | Cordinate Break        |            |          | -323.48   | -       | 0.00          |        |                | 0.000              | 0          | 270.000      | 0     |
| 15         | Standard               | EM No.2    | 143.89   | 0.00      | MIRROR  | 145.1         | -0.308 |                |                    |            |              |       |
| 16         | Cordinate Break        |            |          | 92.52     | -       | 0.00          |        |                | 0.000              | 0          | 0.000        | 1     |
| 17         | Cordinate Break        |            |          | 0.00      | -       | 0.00          |        |                | 0.000              | 0          | 90.000       | 0     |
| 18*        | Paraxial               | EYE        |          | 0.00      |         | 1.95          |        |                | 16.051             | 1          |              |       |
| 19         | Cordinate Break        |            |          | 0.00      | -       | 0.00          |        |                | 0.000              | 0          | 0.000        | 0     |
| 20         | Zernike Standard Phase | Aberration | Infinity | 0.00      |         | 1.95          | 0.00   | -1             | 1<br>(Extrapolate) |            |              |       |
| 21         | Standard               |            | Infinity | 16.05     |         | 1.95          | 0.00   |                |                    |            |              |       |
| 22         | Standard               | Defocus    | Infinity | -0.07     |         | 0.07          | 0.00   |                |                    |            |              |       |
| IMA        | Standard               |            | Infinity |           |         | 0.07          | 0.00   |                |                    |            |              |       |

The Table shows the Zemax parameters of the ellipsoidal mirror system. For the Zernike Standard Phase, the Diffract Order is -1 the Extrapolate is 1.
